# Supplementary material
Source: publisher figshare collection journal article supplement (https://frontiersin.figshare.com/ndownloader/files/14087999)
Supplement: Supplementary file [file 14087999]

## Supporting Information

### Promoting *Shewanella* Bidirectional Extracellular Electron Transfer for Bioelectrocatalysis by Electropolymerized Riboflavin Interface on Carbon Electrode

Long Zou<sup>†</sup>, Xian Wu<sup>†</sup>, Yunhong Huang, Haiyan Ni and Zhong-er Long\*

College of Life Science, Jiangxi Normal University, Nanchang, China

\*Correspondence: Zhong-er Long, [longzhonger@163.com](mailto:longzhonger@163.com)

<sup>†</sup>These authors have contributed equally to this work

#### Section I

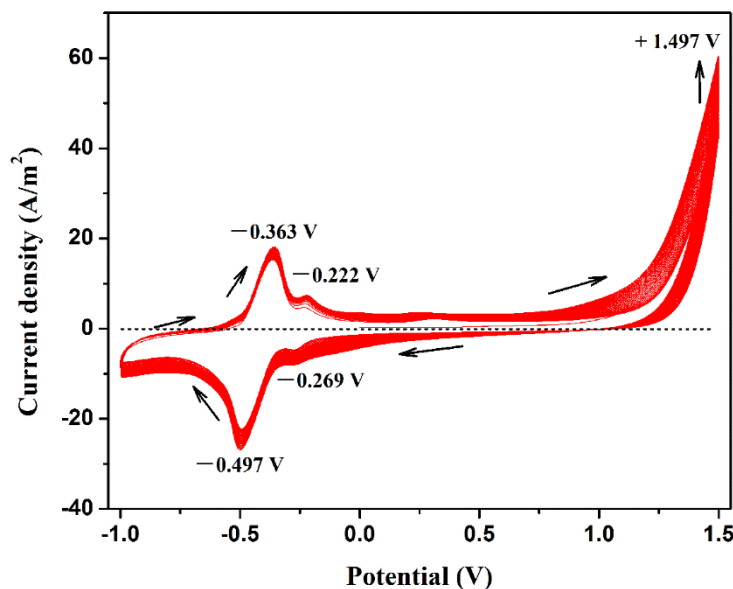

**Figure S1** Electropolymerization CV at a scanning speed of 50 mV/s for 1 mM riboflavin in 0.1 M PBS solution with the addition of 0.15 M NaCl (pH 7.0). Arrows show the direction of peak the changes during the potential cycling.

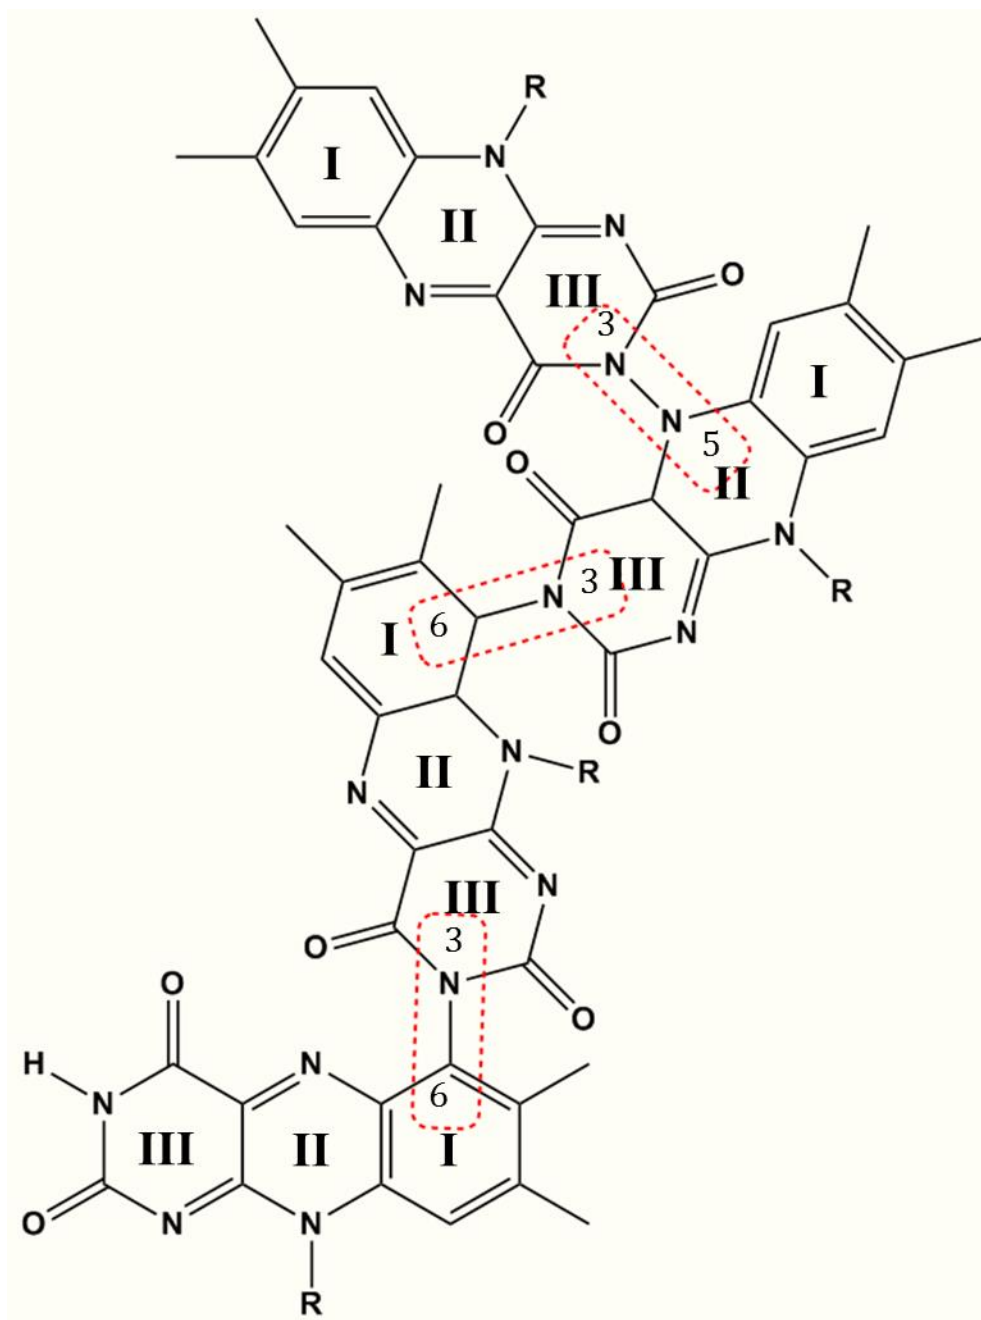

**Figure S2** Presentation of possible bonding mode of polyriboflavin. The possible bounds are highlighted by red dotted box. R is for D-ribityl. It was redraw according to a previous report (Radzevic et al., 2016).

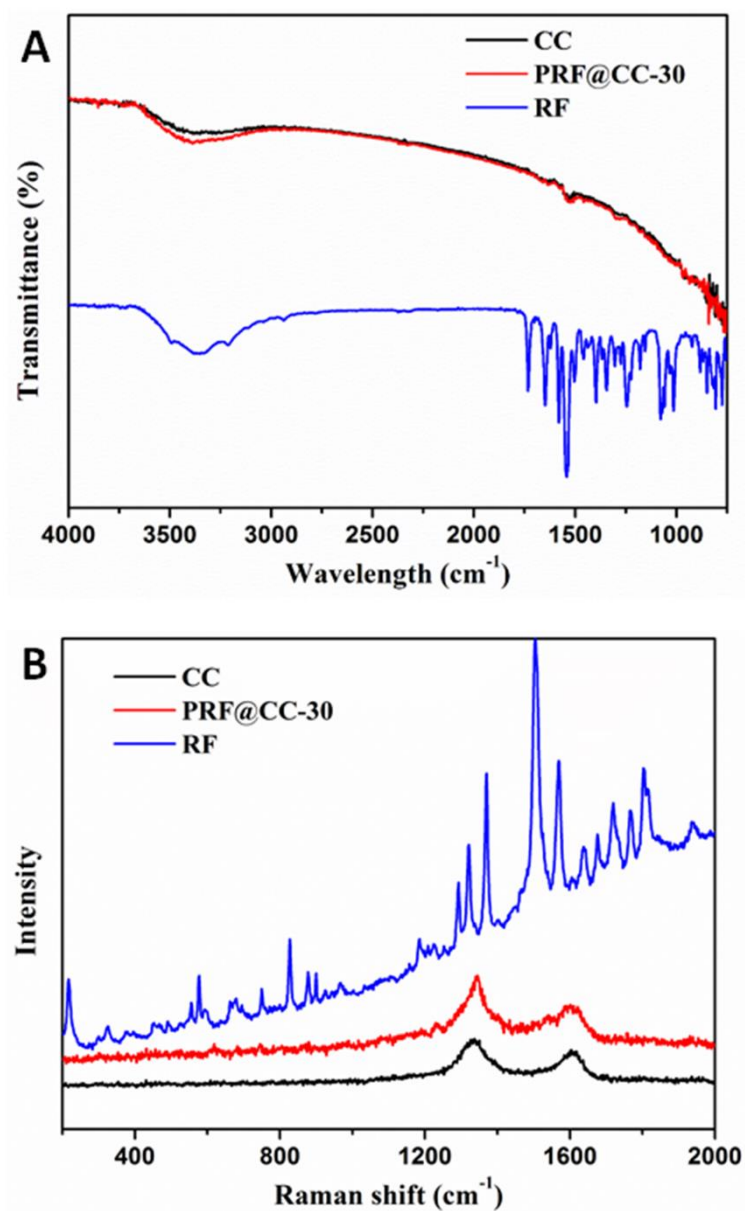

**Figure S3** The fourier transform infrared (FTIR) spectra (A) and Raman spectra (B) of the PRF@CC-30 electrode, CC electrode and pure riboflavin.

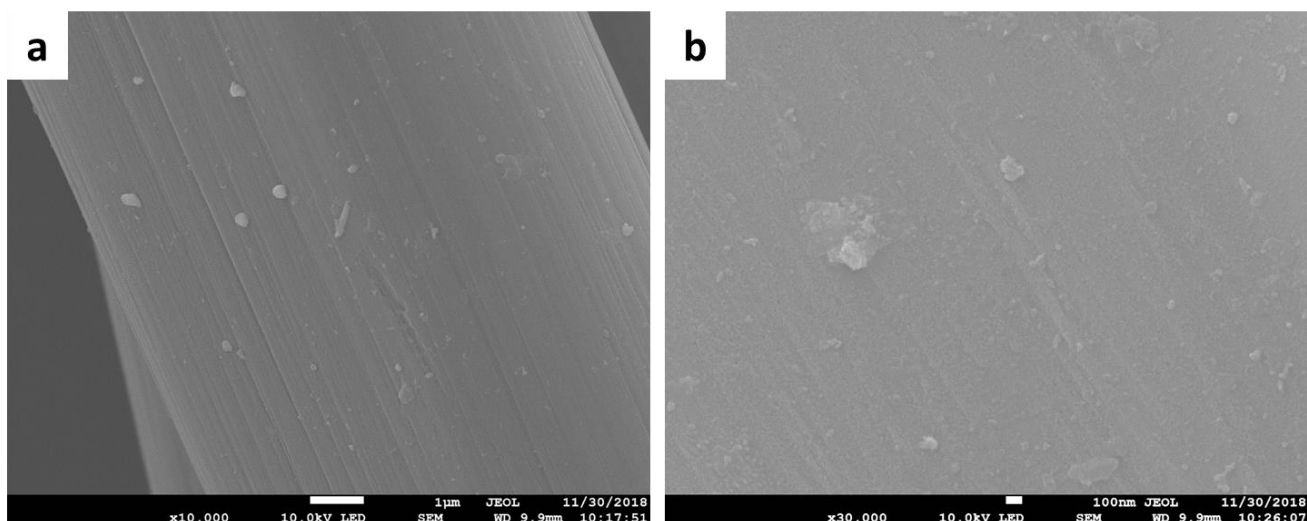

**Figure S4** The SEM images in different resolution of polymerized riboflavin thin film on carbon fiber.

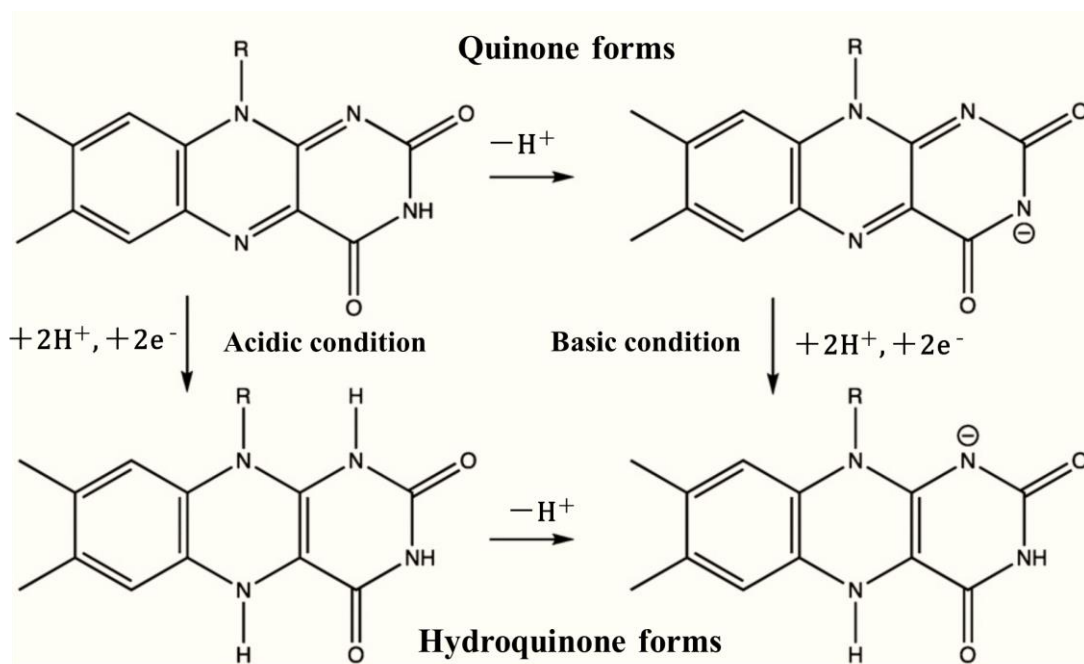

**Figure S5** Schematic diagram of redox reaction between quinone form and hydroquinone form of riboflavin. R is for D-ribityl. It was redrawn according to a previous report (Chatterjee and Foord, 2009).

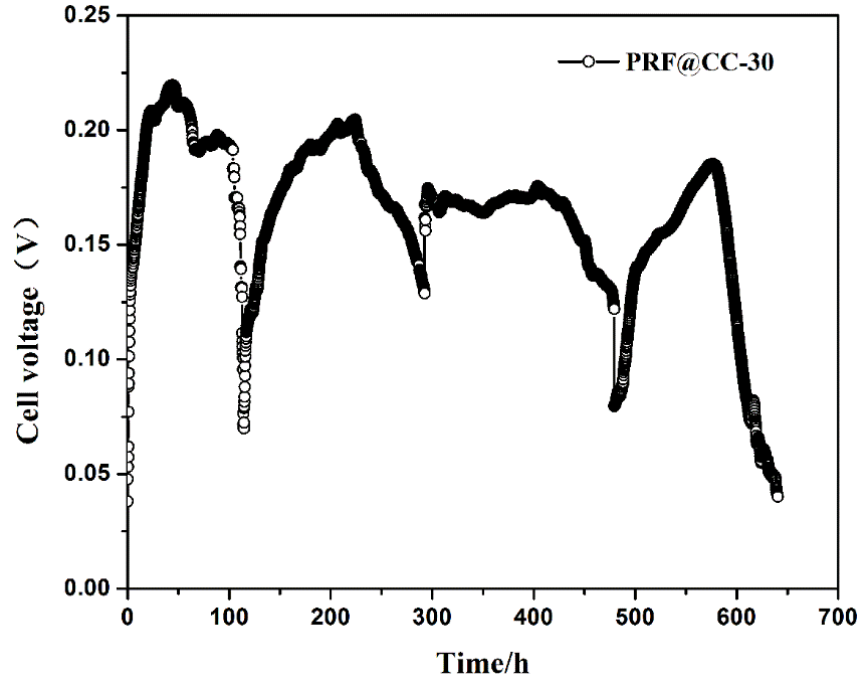

**Figure S6** The four-cycle output voltage of the MFC equipped with PRF@CC-30 anode.

**Table S1** Summary of the recently reported performance of MFCs inoculated with *Shewanella* species under similar operating conditions.

| Electrode            | Inoculum                    | Power density (mW/m <sup>2</sup> ) | Magnification factor | Reference            |
|----------------------|-----------------------------|------------------------------------|----------------------|----------------------|
| CC (carbon cloth)    | <i>S. putrefaciens</i> CN32 | 164                                | 4.31                 | This work            |
| PRF@CC-30            |                             | 707                                |                      |                      |
| CF (carbon felt)     | <i>S. putrefaciens</i> CN32 | 215                                | 4.77                 | (Zou et al., 2017)   |
| Mo <sub>2</sub> C@CF |                             | 1025                               |                      |                      |
| CC                   | <i>S. putrefaciens</i> CN32 | 127                                | 4.57                 | (Wu et al., 2018)    |
| PC/Si/CC             |                             | 580.7                              |                      |                      |
| CC                   | <i>S. loihica</i> PV-4      | 98                                 | 1.43                 | (Liu et al., 2015)   |
| PEDOT/CC             |                             | 140                                |                      |                      |
| CC                   | <i>S. oneidensis</i> MR-1   | 51.5                               | 7.5                  | (Liu et al., 2017)   |
| PANI/CC              |                             | 388.6                              |                      |                      |
| GP (graphite paper)  | <i>S. oneidensis</i> MR-1   | 41                                 | 3.6                  | (Wang et al., 2017)  |
| GP/RF                |                             | 148                                |                      |                      |
| GO/RF                |                             | 257                                |                      |                      |
| CF                   | <i>S. oneidensis</i> MR-1   | 190                                | 2.79                 | (Hasan et al., 2017) |
| NQ-LPEI/CF           |                             | 530                                |                      |                      |

## **Section II: Polyriboflavin interface on graphene modified CC electrode**

The role of polyriboflavin interface in microbial electrocatalysis was further investigated on a graphene modified CC (G/CC) electrode prepared by a facile two-step electrochemical deposition. The electrochemical deposition of graphene onto CC electrode was carried out in a two-electrode electrochemical cell with a platinum sheet as the counter electrode and 0.2 mg/mL graphene oxide (GO) solution as the electrolyte. According to a previous report (Liu et al., 2012), the negative-charged GO was electrophoretically transported onto CC electrode surface by using 0.3 mA/cm<sup>2</sup> anodic current for 15 min, followed by 0.6 mA/cm<sup>2</sup> cathodic current for 90 s to reduce GO to graphene (**Figure S7**). The modification of G/CC electrode with polyriboflavin was also obtained through the same electropolymerization procedure as PRF@CC electrodes, but with different CV cycles from 30 to 60. The prepared electrodes were designated as PRF@G/CC-30, PRF@G/CC-40, PRF@G/CC-50 and PRF@G/CC-60, respectively.

As shown in **Figure S8**, the G/CC-base MFC delivered a much larger output voltage (over 0.2 V) than that of CC-based MFC, which is in good agreement with a previous study (Liu et al., 2012). More impressively, the MFC output voltage still achieved an increase to a great extent with the help of the interfacial functionalization of G/CC electrode with polyriboflavin, accompanying with a faster start-up rate. Furthermore, all the polyriboflavin-functionalized G/CC electrodes also showed much higher current densities and faster start-up rate than the G/CC electrode in three-electrode electrochemical cells where the working electrodes under a fixed potential of + 0.2 V. Compared to the G/CC electrode, the PRF@G/CC-50 electrode a more favorable driving force and faster EET speed in three-electrode half-cell reactor (**Figure S9**). In addition, the polyriboflavin functionalized G/CC electrode also achieved a great enhancement on cathodic fumarate reduction in comparison with the G/CC electrode (**Figure S10**). These results substantially demonstrated the promising potential of electropolymerized riboflavin interface in interfacial functionalization of different carbon electrodes for boosting both anodic and cathodic bioelectrocatalysis performance.

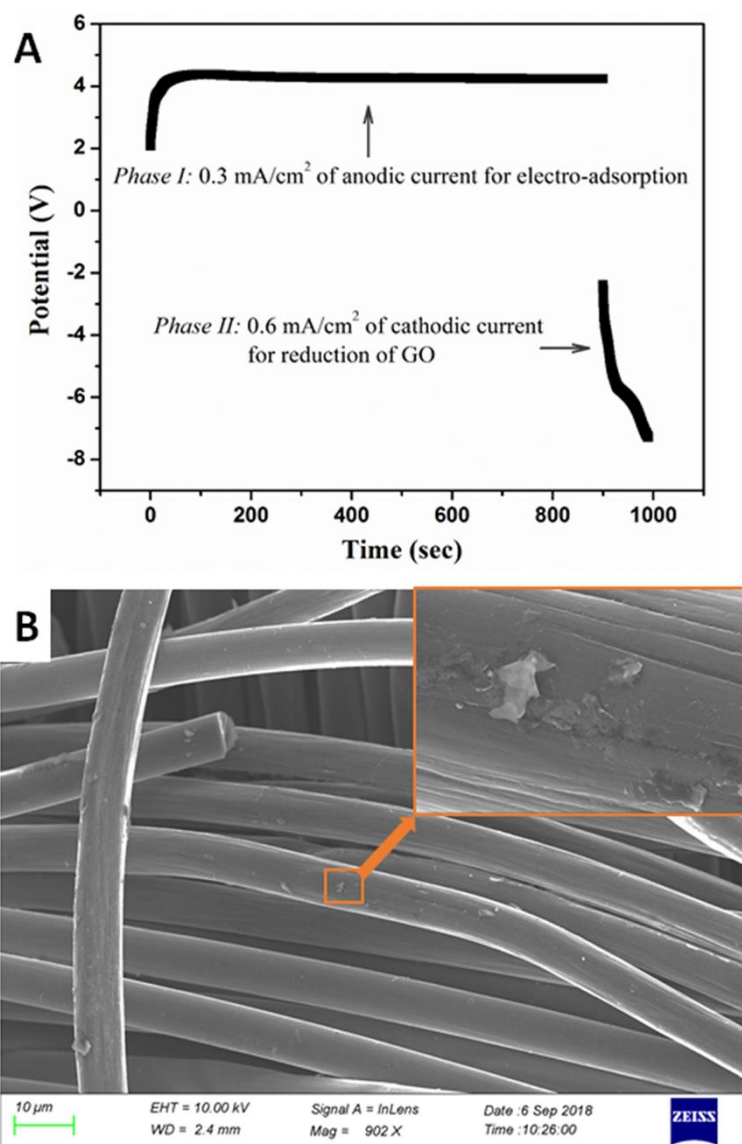

**Figure S7** The constant-current electrochemical deposition of graphene onto CC electrode in a two-electrode cell (A) and the SEM image of prepared G/CC electrode (B).

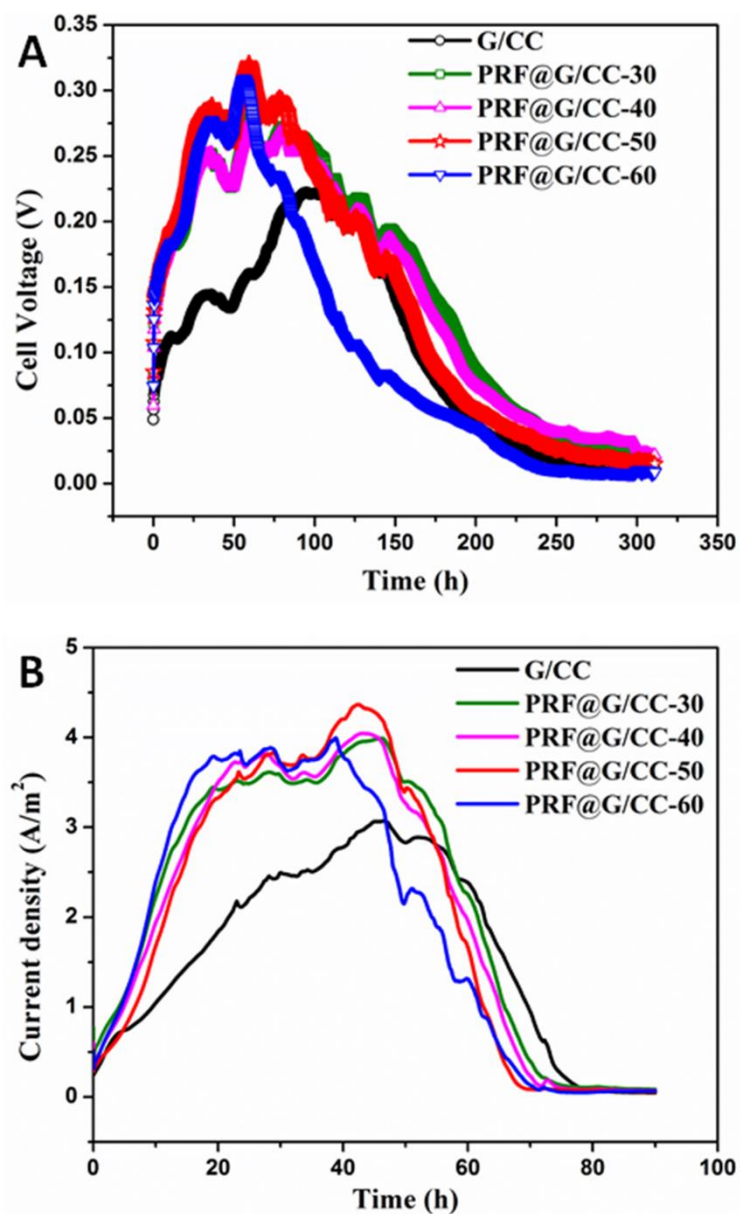

**Figure S8** The output voltage curves of MFCs equipped with different anodes under a external load-resistance of  $1500 \Omega$  (A) and the amperometric I-T curves of different electrode posited at a potential of  $+0.2$  V in three-electrode cells (B).



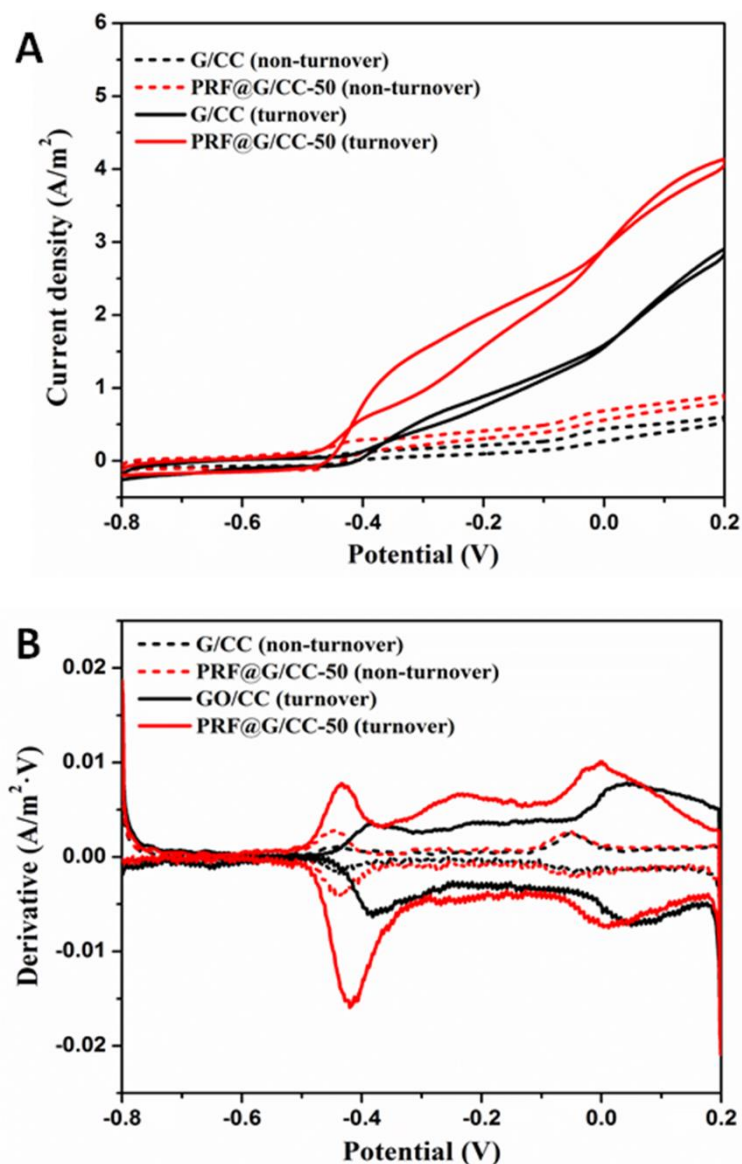

**Figure S9** The CV curves of PRF@G/CC-50 electrode and G/CC electrode under either turnover condition (substrate consumption) or non-turnover condition (substrate depletion) (A), and the corresponding first-order derivatives (B) in three-electrode cells. *Note:* CVs of both two electrodes showed remarkable current response with two-pair obvious redox waves under the turnover condition but negligible response under the non-turnover condition, indicating the bioelectrocatalytic activity towards lactate consumption. Obviously, the CV of PRF@G/CC-50 electrode exhibited much higher bioelectrocatalytic current density with more negative on-set potential compared to the G/CC electrode, which suggests a more favorable driving force and faster EET speed. Additionally, compared to the G/CC electrode, the PRF@G/CC-50 electrode showed similar but larger redox waves under the turnover condition in the potential range of higher than  $-0.55$  V, as shown in the corresponding first-order derivative curves. The above results are in good agreement with that of polyriboflavin functionalization of CC electrode.

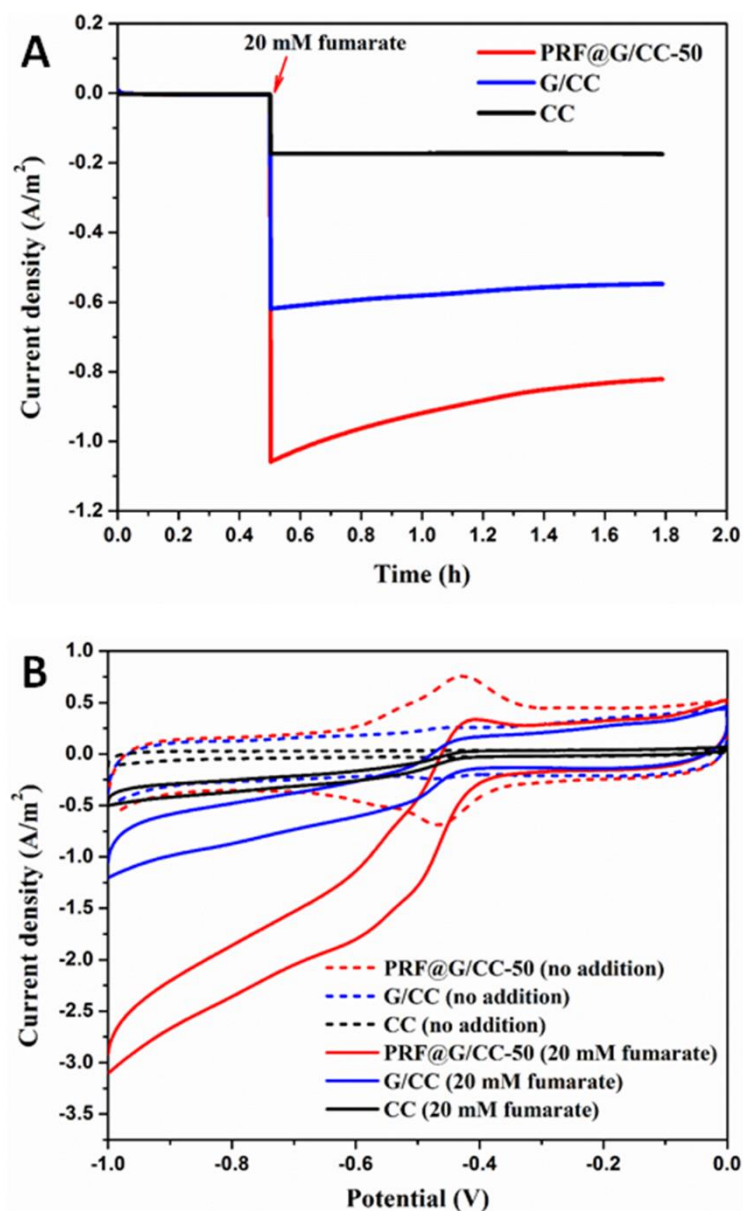

**Figure S10** The bioelectrocatalytic fumarate reduction for the PRF@G/CC-50 and G/CC electrodes in three-electrode cells. (A) Amperometric I-T curves where electrodes were poised at  $-0.6\text{V}$  and 20 mM fumarate was added after 30 min, (B) CV curves of fumarate responses for different electrodes and inoculums (dashed line, no addition; solid line, 20 mM fumarate).

## References

- Chatterjee, A., and Foord, J.S. (2009). Biological applications of diamond electrodes; electrochemical studies of riboflavin. *Diam. Relat. Mater.* 18(5), 899-903. doi: 10.1016/j.diamond.2009.02.016.
- Hasan, K., Grattieri, M., Wang, T., Milton, R.D., and Minteer, S.D. (2017). Enhanced

- bioelectrocatalysis of *Shewanella oneidensis* MR-1 by a naphthoquinone redox polymer. *ACS Energy Lett.* 2(9), 1947-1951. doi: 10.1021/acsenergylett.7b00585.
- Liu, J., Qiao, Y., Guo, C.X., Lim, S., Song, H., and Li, C.M. (2012). Graphene/carbon cloth anode for high-performance mediatorless microbial fuel cells. *Bioresour. Technol.* 114, 275-280. doi: 10.1016/j.biortech.2012.02.116.
- Liu, X., Wu, W., and Gu, Z. (2015). Poly (3,4-ethylenedioxythiophene) promotes direct electron transfer at the interface between *Shewanella loihica* and the anode in a microbial fuel cell. *J. Power Sources* 277, 110-115. doi: 10.1016/j.jpowsour.2014.11.129.
- Liu, X., Zhao, X.H., Yu, Y.Y., Wang, Y.Z., Shi, Y.T., Cheng, Q.W., et al. (2017). Facile fabrication of conductive polyaniline nanoflower modified electrode and its application for microbial energy harvesting. *Electrochim. Acta* 255, 41-47. doi: 10.1016/j.electacta.2017.09.153.
- Radzevic, A., Niaura, G., Ignatjev, I., Rakickas, T., Celiesiute, R., and Pauliukaite, R. (2016). Electropolymerisation of the natural monomer riboflavin and its characterisation. *Electrochim. Acta* 222, 1818-1830. doi: 10.1016/j.electacta.2016.11.166.
- Wang, Q.-Q., Wu, X.-Y., Yu, Y.-Y., Sun, D.-Z., Jia, H.-H., and Yong, Y.-C. (2017). Facile *in-situ* fabrication of graphene/riboflavin electrode for microbial fuel cells. *Electrochim. Acta* 232, 439-444. doi: 10.1016/j.electacta.2017.03.008.
- Wu, X., Qiao, Y., Shi, Z., and Li, C.M. (2018). Enhancement of interfacial bioelectrocatalysis in *Shewanella* microbial fuel cells by a hierarchical porous carbon-silica composite derived from distiller's grains. *Sustain. Energy Fuels* 2(3), 655-662. doi: 10.1039/C7SE00560A.
- Zou, L., Lu, Z., Huang, Y., Long, Z.-e., and Qiao, Y. (2017). Nanoporous Mo<sub>2</sub>C functionalized 3D carbon architecture anode for boosting flavins mediated interfacial bioelectrocatalysis in microbial fuel cells. *J. Power Sources* 359, 549-555. doi: 10.1016/j.jpowsour.2017.05.101.
